# Supplementary material for: New unsymmetrical Schiff base Ni(ii) complexes as scaffolds for dendritic and amino acid superstructures
Source: Royal Society of Chemistry journal article supplement (doi:10.1039/b409298h), 2004-01-01
Supplement: b409298h.pdf [file b409298h.pdf]

**Table** Elemental analyses, MS data

| Complex               | M.P. [°C] | Yield [%] | Molecular formula                                                   | X                      |      |      |       |      |      | (m/z) Calc. | Mass spectra(m/z)<br>(M+H <sup>+</sup> ), or<br>(M+Na <sup>+</sup> ) |
|-----------------------|-----------|-----------|---------------------------------------------------------------------|------------------------|------|------|-------|------|------|-------------|----------------------------------------------------------------------|
|                       |           |           |                                                                     | Elemental analyses [%] |      |      |       |      |      |             |                                                                      |
|                       |           |           |                                                                     | Calculated             |      |      | Found |      |      |             |                                                                      |
| C                     | H         | N         | C                                                                   | H                      | N    |      |       |      |      |             |                                                                      |
| <b>2</b>              | 218-219   | 98        | C <sub>23</sub> H <sub>18</sub> N <sub>2</sub> O <sub>2</sub> Ni    | 66.86                  | 4.40 | 6.78 | 66.9  | 4.18 | 6.67 | 412.08      | 413.1 <sup>a</sup>                                                   |
| <b>3</b>              | 227       | 45        | C <sub>23</sub> H <sub>18</sub> N <sub>2</sub> O <sub>3</sub> Ni    | 64.37                  | 4.24 | 6.53 | 64.28 | 4.37 | 6.37 | 428.08      | 429.1 <sup>a</sup>                                                   |
| <b>4</b>              | 276-277   | 48        | C <sub>23</sub> H <sub>18</sub> N <sub>2</sub> O <sub>3</sub> Ni    | 64.37                  | 4.24 | 6.53 | 64.26 | 4.41 | 6.31 | 428.08      | 429.1 <sup>a</sup>                                                   |
| <b>5</b>              | 105-107   | 90        | C <sub>37</sub> H <sub>35</sub> N <sub>3</sub> O <sub>6</sub> Ni    | 65.70                  | 5.22 | 6.21 | 65.79 | 5.37 | 6.03 | 675.19      | 676.2; 698.2 <sup>a</sup>                                            |
| <b>6</b>              | 198-201   | 90        | C <sub>28</sub> H <sub>25</sub> N <sub>3</sub> O <sub>5</sub> Ni    | 62.03                  | 4.65 | 7.75 | 62.21 | 4.81 | 7.49 | 541.12      | 542.1; 564.1 <sup>a</sup>                                            |
| <b>7</b>              | 129-132   | 60        | C <sub>34</sub> H <sub>37</sub> N <sub>3</sub> O <sub>6</sub> Ni    | 63.47                  | 5.95 | 6.53 | 63.62 | 5.92 | 6.53 | 641.20      | 642.3 <sup>a</sup>                                                   |
| <b>8</b>              | 107-110   | 70        | C <sub>43</sub> H <sub>37</sub> N <sub>3</sub> O <sub>6</sub> Ni    | 68.82                  | 4.97 | 5.60 | 69.01 | 5.41 | 6.10 | 749.20      | 750.1 <sup>a</sup>                                                   |
| <b>9</b>              | 99-103    | 80        | C <sub>44</sub> H <sub>39</sub> N <sub>3</sub> O <sub>6</sub> Ni    | 69.13                  | 5.14 | 5.50 | 69.29 | 5.55 | 6.07 | 763.22      | 786.3 <sup>b</sup>                                                   |
| <b>10</b>             | 145-148   | 60        | C <sub>30</sub> H <sub>27</sub> N <sub>3</sub> O <sub>5</sub> Ni    | 63.41                  | 4.79 | 7.39 | 63.59 | 4.91 | 7.81 | 567.13      | 568.0; 590.0 <sup>b</sup>                                            |
| <b>11</b>             | 218-220   | 80        | C <sub>29</sub> H <sub>26</sub> N <sub>4</sub> O <sub>6</sub> Ni    | 59.52                  | 4.48 | 9.57 | 59.64 | 4.52 | 9.37 | 584.12      | 585.1; 606.9 <sup>b</sup>                                            |
| <b>3D<sub>1</sub></b> | 234-235   | 88        | C <sub>44</sub> H <sub>30</sub> N <sub>2</sub> O <sub>8</sub> Ni    | 68.33                  | 3.91 | 3.62 | 67.92 | 3.78 | 3.51 | 772.14      | 795.22 <sup>b</sup>                                                  |
| <b>3D<sub>2</sub></b> | 89-91     | 89        | C <sub>72</sub> H <sub>46</sub> N <sub>2</sub> O <sub>16</sub> Ni   | 68.97                  | 3.70 | 2.23 | 68.53 | 3.62 | 2.18 | 1252.22     | 1253.98; 1275.94 <sup>b</sup>                                        |
| <b>4D<sub>1</sub></b> | 245-246   | 20        | C <sub>44</sub> H <sub>30</sub> N <sub>2</sub> O <sub>8</sub> Ni    | 68.33                  | 3.91 | 3.62 | 67.84 | 3.69 | 3.43 | 772.14      | 795.24 <sup>b</sup>                                                  |
| <b>4D<sub>2</sub></b> | 85-86     | 15        | C <sub>72</sub> H <sub>46</sub> N <sub>2</sub> O <sub>16</sub> Ni   | 68.97                  | 3.70 | 2.23 | 68.39 | 3.55 | 2.19 | 1252.22     | 1275.18 <sup>b</sup>                                                 |
| <b>3D<sub>3</sub></b> | 234-236   | 53        | C <sub>44</sub> H <sub>35</sub> N <sub>2</sub> O <sub>5</sub> Ni    | 72.25                  | 4.96 | 3.83 | 73.02 | 5.25 | 3.22 | 730.20      | 731.2 <sup>a</sup>                                                   |
| <b>3D<sub>4</sub></b> | 65-66     | 38        | C <sub>72</sub> H <sub>60</sub> N <sub>2</sub> O <sub>9</sub> Ni    | 74.81                  | 5.23 | 2.42 | 73.82 | 4.90 | 2.24 | 1154.36     | 1155.5; 1177.4 <sup>a</sup>                                          |
| <b>3D<sub>5</sub></b> | -         | 46        | C <sub>128</sub> H <sub>108</sub> N <sub>2</sub> O <sub>17</sub> Ni | 76.68                  | 5.43 | 1.40 | 76.05 | 5.23 | 1.25 | 2002.70     | 2025.54 <sup>a</sup>                                                 |
| <b>4D<sub>3</sub></b> | 137-136   | 92        | C <sub>44</sub> H <sub>35</sub> N <sub>2</sub> O <sub>5</sub> Ni    | 72.25                  | 4.96 | 3.83 | 73.73 | 5.18 | 3.38 | 730.20      | 731.2 <sup>a</sup>                                                   |
| <b>4D<sub>4</sub></b> | -         | 86        | C <sub>72</sub> H <sub>60</sub> N <sub>2</sub> O <sub>9</sub> Ni    | 74.81                  | 5.23 | 2.42 | 73.78 | 5.26 | 2.24 | 1154.36     | 1155.33; 1177.33 <sup>b</sup>                                        |
| <b>4D<sub>5</sub></b> | -         | 81        | C <sub>128</sub> H <sub>108</sub> N <sub>2</sub> O <sub>17</sub> Ni | 76.68                  | 5.43 | 1.40 | 76.12 | 5.06 | 1.34 | 2002.70     | 2025.78 <sup>b</sup>                                                 |

<sup>a</sup> ESI-MS; <sup>b</sup> MALDI-TOF

| <sup>1</sup> H NMR, CDCl <sub>3</sub> , δ (ppm)                                                                                                                                                                                                                                                                                                                                                                                                                                                                                                                                                                                                                                                                        |                                                                                                                                                                                                                                                                                                                                                                                                                          |                                                                                                          |
|------------------------------------------------------------------------------------------------------------------------------------------------------------------------------------------------------------------------------------------------------------------------------------------------------------------------------------------------------------------------------------------------------------------------------------------------------------------------------------------------------------------------------------------------------------------------------------------------------------------------------------------------------------------------------------------------------------------------|--------------------------------------------------------------------------------------------------------------------------------------------------------------------------------------------------------------------------------------------------------------------------------------------------------------------------------------------------------------------------------------------------------------------------|----------------------------------------------------------------------------------------------------------|
| Schiff-base framework                                                                                                                                                                                                                                                                                                                                                                                                                                                                                                                                                                                                                                                                                                  | O-substituents                                                                                                                                                                                                                                                                                                                                                                                                           |                                                                                                          |
| <b>2</b> 2.53 (s, 3H, -CH <sub>3</sub> ); 6.03 (s, 1H, -CH=); [6.64 (t, 1H, <i>J</i> = 7.3 Hz), 7.00 – 7.12 (m, 3H), 7.26 – 7.42 (m, 6H), 7.64 (dd, 1H, <i>J</i> <sub>o</sub> = 8.1 Hz, <i>J</i> <sub>m</sub> = 1.2 Hz), 7.88 (dd, 2H, <i>J</i> <sub>o</sub> = 7.8 Hz, <i>J</i> <sub>m</sub> = 1.7 Hz)] (13H, <i>o</i> -C <sub>6</sub> H <sub>4</sub> , C <sub>6</sub> H <sub>4</sub> , C <sub>6</sub> H <sub>5</sub> ); 8.19 (s, 1H, HC=N)                                                                                                                                                                                                                                                                            | -                                                                                                                                                                                                                                                                                                                                                                                                                        |                                                                                                          |
| <b>3</b> 2.45 (s, 3H, -CH <sub>3</sub> ); 5.98 (s, 1H, -CH=); [6.53 (t, 1H, <i>J</i> = 7.4 Hz), 6.85 (td, 2H, <i>J</i> <sub>o</sub> = 8.5 Hz, <i>J</i> <sub>d</sub> = 1.7 Hz), 7.00 (dtd, 2H, <i>J</i> <sub>o</sub> = 22.3 Hz, <i>J</i> <sub>t</sub> = 7.7 Hz, <i>J</i> <sub>d</sub> = 1.3 Hz), 7.25 (dd, 1H, <i>J</i> <sub>o</sub> = 8.25 Hz, <i>J</i> <sub>m</sub> = 1.1 Hz), 7.33-7.45 (m, 3H), 7.52 (dd, 1H, <i>J</i> <sub>o</sub> = 8.3 Hz, <i>J</i> <sub>m</sub> = 1.4 Hz), 7.79 (dt, 2H, <i>J</i> <sub>d</sub> = 6.3 Hz, <i>J</i> <sub>t</sub> = 1.7 Hz)] (12H, <i>o</i> -C <sub>6</sub> H <sub>4</sub> , C <sub>6</sub> H <sub>3</sub> , C <sub>6</sub> H <sub>5</sub> ); 6.70 (s, 1H, OH); 8.09 (s, 1H, HC=N) | -                                                                                                                                                                                                                                                                                                                                                                                                                        |                                                                                                          |
| <b>4<sup>a</sup></b> 2.53 (s, 3H, -CH <sub>3</sub> ); 6.22 (s, 1H, -CH=); [6.75 (m, 1H), 6.90 (m, 2H), 7.11 (dt, 2H, <i>J</i> <sub>d</sub> = 23.0 Hz, <i>J</i> <sub>t</sub> = 7.3 Hz), 7.43 – 7.52 (m, 4H), 7.84 (d, 2H, <i>J</i> = 7.1 Hz), 8.05 (d, 1H, <i>J</i> = 7.8 Hz)] (12H, <i>o</i> -C <sub>6</sub> H <sub>4</sub> , C <sub>6</sub> H <sub>3</sub> , C <sub>6</sub> H <sub>5</sub> ); 8.61 (s, 1H, N=CH); 8.77 (s, 1H, OH);                                                                                                                                                                                                                                                                                   | -                                                                                                                                                                                                                                                                                                                                                                                                                        |                                                                                                          |
| <b>5</b> 2.47 (s, 3H, -CH <sub>3</sub> ); 5.90 (s, 1H, -CH=); 6.56 (t, 1H, C <sub>6</sub> H <sub>3</sub> , <i>J</i> =8Hz); 6.95-7.67 (m, 17H, <i>o</i> -C <sub>6</sub> H <sub>4</sub> , C <sub>6</sub> H <sub>3</sub> , C <sub>6</sub> H <sub>5</sub> -Phe, C <sub>6</sub> H <sub>5</sub> -complex); 8.18 (s, 1H, HC=N)                                                                                                                                                                                                                                                                                                                                                                                                | 1.40 (s, 9H, d); 3.15 (dd, 1H, b, <i>J</i> <sub>ba</sub> =6Hz, <i>J</i> <sub>bb</sub> =13.5Hz); 3.42 (dd, 1H, b', <i>J</i> <sub>b'a</sub> =4.5Hz, <i>J</i> <sub>bb</sub> =13.5Hz); 4.85 (m, 1H, a); 5.18 (d, 1H, c, <i>J</i> <sub>ca</sub> =7Hz);                                                                                                                                                                        |                                                                                                          |
| <b>6</b> 2.47 (s, 3H, -CH <sub>3</sub> ); 5.88 (s, 1H, -CH=); 6.56 (t, 1H, C <sub>6</sub> H <sub>3</sub> , <i>J</i> =8Hz); 6.97-7.68 (m, 12H, <i>o</i> -C <sub>6</sub> H <sub>4</sub> , C <sub>6</sub> H <sub>3</sub> , C <sub>6</sub> H <sub>5</sub> ); 8.15 (s, 1H, HC=N);                                                                                                                                                                                                                                                                                                                                                                                                                                           | 1.52 (d, 3H, b, <i>J</i> <sub>ab</sub> =7Hz); 1.75 (s, 3H, d); 4.91 (qn, 1H, a, <i>J</i> <sub>ab</sub> = <i>J</i> <sub>ac</sub> =7Hz); 6.48 (d, 1H, c, <i>J</i> <sub>ac</sub> =7);                                                                                                                                                                                                                                       |                                                                                                          |
| <b>7</b> 2.51 (s, 3H, -CH <sub>3</sub> ); 6.01 (s, 1H, -CH=); 6.99-7.86 (m, 12H, <i>o</i> -C <sub>6</sub> H <sub>4</sub> , C <sub>6</sub> H <sub>3</sub> , C <sub>6</sub> H <sub>5</sub> ); 8.11 (s, 1H, HC=N);                                                                                                                                                                                                                                                                                                                                                                                                                                                                                                        | 1.02 (d, 6H, d, <i>J</i> <sub>dc</sub> =6Hz); 1.47 (s, 9H, f); 1.63 (m, 1H, c); 1.81 (s, 2H, b); 4.51 (m, 1H, a); 4.95 (d, 1H, e, <i>J</i> <sub>ae</sub> =8Hz);                                                                                                                                                                                                                                                          |                                                                                                          |
| <b>8</b> 2.51 (s, 3H, -CH <sub>3</sub> ); 6.02 (s, 1H, -CH=); 6.99-7.86 (m, 20H, <i>o</i> -C <sub>6</sub> H <sub>4</sub> , C <sub>6</sub> H <sub>3</sub> , C <sub>6</sub> H <sub>5</sub> , C <sub>12</sub> H <sub>8</sub> -Fmoc); 8.10 (s, 1H, HC=N);                                                                                                                                                                                                                                                                                                                                                                                                                                                                  | 1.05 (d, 3H, c, <i>J</i> <sub>bc</sub> =6.5Hz); 1.09 (d, 3H, c', <i>J</i> <sub>bc'</sub> =6.5Hz); 1.55 (m, 1H, b); 4.26 (m, 1H, f); 4.45 (m, 2H, e); 4.51 (m, 1H, a); 5.35 (d, 1H, d, <i>J</i> <sub>ad</sub> =9Hz);                                                                                                                                                                                                      |                                                                                                          |
| <b>9</b> 2.51 (s, 3H, -CH <sub>3</sub> ); 6.02 (s, 1H, -CH=); 6.99-7.86 (m, 20H, <i>o</i> -C <sub>6</sub> H <sub>4</sub> , C <sub>6</sub> H <sub>3</sub> , C <sub>6</sub> H <sub>5</sub> , C <sub>12</sub> H <sub>8</sub> -Fmoc); 8.10 (s, 1H, HC=N);                                                                                                                                                                                                                                                                                                                                                                                                                                                                  | 1.00-1.57 (m, 8H, b, c, d, e); 4.26 (t, 1H, h, <i>J</i> <sub>gh</sub> =7Hz); 4.44 (m, 1H, g); 4.54 (m, 2H, a, g); 5.36 (d, 1H, f, <i>J</i> <sub>af</sub> =9Hz);                                                                                                                                                                                                                                                          |                                                                                                          |
| <b>10</b> 2.50 (s, 3H, -CH <sub>3</sub> ); 6.01 (s, 1H, -CH=); 6.99-7.86 (m, 12H, <i>o</i> -C <sub>6</sub> H <sub>4</sub> , C <sub>6</sub> H <sub>3</sub> , C <sub>6</sub> H <sub>5</sub> ); 8.11 (s, 1H, HC=N);                                                                                                                                                                                                                                                                                                                                                                                                                                                                                                       | 2.10 (s, 0.1H, e-cis); 2.13 (s, 0.9, e-trans); 2.15-2.22 (m, 3H, b, c); 2.33 (m, 1H, b'); 3.57 (m, 1H, d); 3.69 (m, 1H, d'); 4.57 (dd, 0.1H, a-cis, <i>J</i> <sub>a-cis,b</sub> =3Hz, <i>J</i> <sub>a-cis,b'</sub> =8.5Hz); 4.64 (dd, 0.9H, a-trans, <i>J</i> <sub>a-trans,b</sub> =4Hz, <i>J</i> <sub>a-trans,b'</sub> =8.5Hz);                                                                                         |                                                                                                          |
| <b>11</b> 2.54 (s, 3H, -CH <sub>3</sub> ); 6.24 (s, 1H, -CH=); 6.87-7.85 (m, 12H, <i>o</i> -C <sub>6</sub> H <sub>4</sub> , C <sub>6</sub> H <sub>3</sub> , C <sub>6</sub> H <sub>5</sub> ); 8.84 (s, 1H, HC=N);                                                                                                                                                                                                                                                                                                                                                                                                                                                                                                       | 1.88 (s, 3H, e); 3.76 (d, 2H, c, <i>J</i> <sub>cd</sub> =6Hz); 4.10 (d, 2H, a, <i>J</i> <sub>ab</sub> =6Hz); 8.15 (t, 1H, d, <i>J</i> <sub>cd</sub> =6Hz); 8.40 (t, 1H, b, <i>J</i> <sub>ab</sub> =6Hz);                                                                                                                                                                                                                 |                                                                                                          |
| <b>3D<sub>1</sub></b> 2.4 (s, 3H, -CH <sub>3</sub> ); 5.9 (s, 1H, -CH=); 6.5 (t, <i>J</i> = 7.5 Hz, 1H, C <sub>6</sub> H <sub>3</sub> ); 6.8 – 7.7 (m, 18H, <i>o</i> -C <sub>6</sub> H <sub>4</sub> , C <sub>6</sub> H <sub>3</sub> , C <sub>6</sub> H <sub>5</sub> ); 8.17 (m, 5H, -CH=N-, <i>o</i> -C <sub>6</sub> H <sub>4</sub> , C <sub>6</sub> H <sub>3</sub> )                                                                                                                                                                                                                                                                                                                                                  | 8.1 (d, <i>J</i> = 2 Hz, 2H, C <sub>6</sub> H <sub>3</sub> );<br><i>b</i>                                                                                                                                                                                                                                                                                                                                                |                                                                                                          |
| <b>3D<sub>2</sub></b> 2.44 (s, 3H, -CH <sub>3</sub> ); 5.9 (m, 1H, -CH=); 6.6 (m, 1H, C <sub>6</sub> H <sub>3</sub> ); 6.9 – 7.7 (m, 19H, <i>o</i> -C <sub>6</sub> H <sub>4</sub> , C <sub>6</sub> H <sub>3</sub> , C <sub>6</sub> H <sub>5</sub> ); 7.8 – 8.4 (m, 22H, <i>o</i> -C <sub>6</sub> H <sub>4</sub> , C <sub>6</sub> H <sub>3</sub> , C <sub>6</sub> H <sub>5</sub> , -CH=N-)                                                                                                                                                                                                                                                                                                                              | <i>b</i>                                                                                                                                                                                                                                                                                                                                                                                                                 |                                                                                                          |
| <b>4D<sub>1</sub></b> 2.5 (s, 3H, -CH <sub>3</sub> ); 6.0 (s, 1H, -CH=); 6.5 (t, <i>J</i> = 7.5 Hz, 1H, C <sub>6</sub> H <sub>3</sub> ); 7.0 – 7.85 (m, 19H, C <sub>6</sub> H <sub>3</sub> , C <sub>6</sub> H <sub>5</sub> , <i>o</i> -C <sub>6</sub> H <sub>4</sub> , 8.14 – 8.20 (m, 4H)                                                                                                                                                                                                                                                                                                                                                                                                                             | 7.98 (d, <i>J</i> = 2.2 Hz, 1H, C <sub>6</sub> H <sub>3</sub> );<br><i>b</i>                                                                                                                                                                                                                                                                                                                                             |                                                                                                          |
| <b>4D<sub>2</sub></b> 2.5 (s, 3H, -CH <sub>3</sub> ); 6.0 (s, 1H, -CH=); 6.5 (t, <i>J</i> = 7.5 Hz, 1H, C <sub>6</sub> H <sub>3</sub> ); 7.0 – 7.85 (36H, C <sub>6</sub> H <sub>5</sub> , C <sub>6</sub> H <sub>3</sub> , <i>o</i> -C <sub>6</sub> H <sub>4</sub> , 8.15 – 8.20 (m, 4H)                                                                                                                                                                                                                                                                                                                                                                                                                                | 7.9 (d, <i>J</i> = 2.2 Hz, 1H, C <sub>6</sub> H <sub>3</sub> );<br><i>b</i>                                                                                                                                                                                                                                                                                                                                              |                                                                                                          |
| <b>3D<sub>3</sub></b> 2.5 (s, 3H, -CH <sub>3</sub> ); 6.02 (s, 1H, -CH=); 6.5 (t, <i>J</i> = 7.8 Hz, 1H, C <sub>6</sub> H <sub>3</sub> ); 6.87 – 7.8 (m, 22H, <i>o</i> -C <sub>6</sub> H <sub>4</sub> , C <sub>6</sub> H <sub>5</sub> , C <sub>6</sub> H <sub>3</sub> , 8.19 (s, 1H, HC=N);                                                                                                                                                                                                                                                                                                                                                                                                                            | 5.02 (s, 4H, -CH <sub>2</sub> -( <i>b</i> )); 5.23 (s, 2H, -CH <sub>2</sub> -( <i>a</i> )); 6.57 (t, <i>J</i> = 2 Hz, 1H, C <sub>6</sub> H <sub>3</sub> ); 6.82 (d, <i>J</i> = 2 Hz, 2H, C <sub>6</sub> H <sub>3</sub> );<br><i>b</i>                                                                                                                                                                                    |                                                                                                          |
| <b>3D<sub>4</sub></b> 2.47 (s, 3H, -CH <sub>3</sub> ); 6.0 (s, 1H, -CH=); 6.87, 6.98 (dd, <i>J</i> <sub>1</sub> = 1.4, <i>J</i> <sub>2</sub> = 7.4, 1H, td, <i>J</i> <sub>1</sub> = 1.4 Hz, <i>J</i> <sub>2</sub> = 8.2, 2H, <i>o</i> -C <sub>6</sub> H <sub>4</sub> , C <sub>6</sub> H <sub>3</sub> ); 7.07 – 7.8 (m, 27H, C <sub>6</sub> H <sub>3</sub> , C <sub>6</sub> H <sub>5</sub> , <i>o</i> -C <sub>6</sub> H <sub>4</sub> , 8.15 (s, 1H, -HC=N-);                                                                                                                                                                                                                                                            | 4.96 (s, 4H, -CH <sub>2</sub> -( <i>b</i> )), 4.98 (s, 8H, -CH <sub>2</sub> -( <i>c</i> )), 5.2 (s, 2H, -CH <sub>2</sub> -( <i>a</i> )); 6.52 (m, 5H, C <sub>6</sub> H <sub>3</sub> , C <sub>6</sub> H <sub>5</sub> ); 6.62 (d, 4H, <i>J</i> = 1.8 Hz, C <sub>6</sub> H <sub>3</sub> ); 6.82 (d, 2H, <i>J</i> = 1.9 Hz, C <sub>6</sub> H <sub>3</sub> );<br><i>b</i>                                                     |                                                                                                          |
| <b>3D<sub>5</sub></b> 2.5 (s, 3H, -CH <sub>3</sub> ); 6.0 (s, 1H, -CH=); 6.8 – 7.8 (m, 60H, <i>o</i> -C <sub>6</sub> H <sub>4</sub> , C <sub>6</sub> H <sub>3</sub> , C <sub>6</sub> H <sub>5</sub> ) 8.15 (s, 1H, -HC=N-)                                                                                                                                                                                                                                                                                                                                                                                                                                                                                             | 4.96 (s, 4H, -CH <sub>2</sub> -( <i>b</i> )); 4.98 (s, 8H, -CH <sub>2</sub> -( <i>c</i> )); 5.0 (s, 16H, -CH <sub>2</sub> -( <i>d</i> )); 5.2 (s, 2H, -CH <sub>2</sub> -( <i>a</i> )); 6.5-6.6 (m, 13H, C <sub>6</sub> H <sub>3</sub> );<br><i>b</i>                                                                                                                                                                     |                                                                                                          |
| <b>4D<sub>3</sub></b> 2.5 (s, 3H, CH <sub>3</sub> ); 6.0 (s, 1H, -CH=); 6.7 – 7.8 (m, 25H, <i>o</i> -C <sub>6</sub> H <sub>4</sub> , C <sub>6</sub> H <sub>3</sub> , C <sub>6</sub> H <sub>5</sub> ) 8.05 (s, 1H, N=CH)                                                                                                                                                                                                                                                                                                                                                                                                                                                                                                | 4.93 (s, 2H, -CH <sub>2</sub> -( <i>a</i> )); 5.03 (s, 4H, -CH <sub>2</sub> -( <i>b</i> ));<br><i>b</i>                                                                                                                                                                                                                                                                                                                  | 4.93 (s, 2H, -CH <sub>2</sub> -( <i>c</i> )); 5.03 (s, 4H, -CH <sub>2</sub> -( <i>d</i> ));<br>Hz, 1H, C |
| <b>4D<sub>4</sub></b> 2.46 (s, 3H, CH <sub>3</sub> ); 5.97 (s, 1H, -CH=); 6.7 – 7.8 (m, 32H, <i>o</i> -C <sub>6</sub> H <sub>4</sub> , C <sub>6</sub> H <sub>3</sub> , C <sub>6</sub> H <sub>5</sub> , 8.0 (s, 1H, N=CH)                                                                                                                                                                                                                                                                                                                                                                                                                                                                                               | 4.90 (s, 2H, -CH <sub>2</sub> -( <i>a</i> )); 4.95 (s, 4H, -CH <sub>2</sub> -( <i>b</i> )); 5.0 (s, 8H, -CH <sub>2</sub> -( <i>c</i> )); 6.53 (t, <i>J</i> = 2.2 Hz, 1H, C <sub>6</sub> H <sub>3</sub> ); 6.56 (t, <i>J</i> = 2.2 Hz, 2H, C <sub>6</sub> H <sub>3</sub> ); 6.64 (d, <i>J</i> = 2.2 Hz, 2H, C <sub>6</sub> H <sub>3</sub> ); 6.66 (d, <i>J</i> = 2.4 Hz, 4H, C <sub>6</sub> H <sub>3</sub> );<br><i>b</i> |                                                                                                          |
| <b>4D<sub>5</sub></b> 2.5 (s <broad>, 3H, -CH <sub>3</sub> ), 6.0 (s <broad>, 1H, -CH=), 6.5 – 7.8 (m, 73H, C <sub>6</sub> H <sub>3</sub> , <i>o</i> -C <sub>6</sub> H <sub>4</sub> , C <sub>6</sub> H <sub>3</sub> , C <sub>6</sub> H <sub>5</sub> , 8.0 (s <broad>, 1H, N=CH)                                                                                                                                                                                                                                                                                                                                                                                                                                        | 4.90 (s, 2H, -CH <sub>2</sub> -( <i>a</i> )); 4.95 (s, 4H, -CH <sub>2</sub> -( <i>b</i> )); 5.0 (m, 24H, -CH <sub>2</sub> -( <i>c</i> and <i>d</i> ));<br><i>b</i>                                                                                                                                                                                                                                                       |                                                                                                          |

<sup>a</sup> -in DMSO, <sup>b</sup> some signals obscured by that of Schiff base part (column 2)

$^{13}\text{C}$  NMR.  $\delta$  (ppm),  $\text{CDCl}_3$ 

|                 | Schiff-base framework                                                                                                                                                                                                                                                                                                                                                                                                                                                                                               | O-substituents                                                                                                                                                      |
|-----------------|---------------------------------------------------------------------------------------------------------------------------------------------------------------------------------------------------------------------------------------------------------------------------------------------------------------------------------------------------------------------------------------------------------------------------------------------------------------------------------------------------------------------|---------------------------------------------------------------------------------------------------------------------------------------------------------------------|
| 2               | 25.44 (-CH <sub>3</sub> ); 103.03 (-CH=); 114.66, 115.89, 120.34, 122.22, 123.85, 126.45, 127.73, 128.35, 130.71, 133.29, 135.02, 136.67, 142.96, 145.11; 153.18; 165.27 ( <i>o</i> -C <sub>6</sub> H <sub>4</sub> , C <sub>6</sub> H <sub>3</sub> , C <sub>6</sub> H <sub>5</sub> =C-N); 165.94 (C=N); 175.03 (C=O);                                                                                                                                                                                               |                                                                                                                                                                     |
| 3               | 25.42 (-CH <sub>3</sub> ); 103.08 (-CH=); 114.78, 115.05, 115.85, 118.92, 122.26, 123.18, 124.00, 126.59, 127.49, 128.48, 130.83, 136.37, 142.84, 145.20, 147.80; 153.37; 153.42 154.26 ( <i>o</i> -C <sub>6</sub> H <sub>4</sub> , C <sub>6</sub> H <sub>3</sub> , C <sub>6</sub> H <sub>5</sub> =C-N); 165.37 (C=N); 174.43 (C=O)                                                                                                                                                                                 |                                                                                                                                                                     |
| 4 <sup>a</sup>  | 24.79 (-CH <sub>3</sub> ); 101.90 (-CH=); 114.49, 115.55, 119.18, 120.66, 121.86, 123.76, 125.91, 126.34, 126.82, 128.22, 130.46, 135.88, 142.48, 143.51, 146.15, 154.06; 159.34 ( <i>o</i> -C <sub>6</sub> H <sub>4</sub> , C <sub>6</sub> H <sub>3</sub> , C <sub>6</sub> H <sub>5</sub> =C-N); 165.77 (C=N); 172.70 (C=O)                                                                                                                                                                                        |                                                                                                                                                                     |
| 5               | 24.93(-CH <sub>3</sub> ); 103.19(-CH=); 114.33, 114.73, 121.97, 123.65, 126.42, 126.64, 127.05, 128.11, 128.25, 129.79, 130.23, 130.99, 136.67, 141.91, 142.49, 145.15, 152.94, 157.05, 164.74 ( <i>o</i> -C <sub>6</sub> H <sub>4</sub> , C <sub>6</sub> H <sub>3</sub> , C <sub>6</sub> H <sub>5</sub> -Phe, C <sub>6</sub> H <sub>5</sub> , N-C=, C=N, C4); 175.37(C=O);                                                                                                                                         | 28.33(C6); 38.20(C3); 54.68(C2); 79.58(C5); 170.03(C1);                                                                                                             |
| 6               | 24.91(-CH <sub>3</sub> ); 103.63(-CH=); 114.50, 114.79, 121.77, 122.03, 123.90, 126.11, 126.69, 127.14, 128.14, 129.01, 130.48, 130.88, 136.94, 142.30, 142.52, 144.97, 153.04, 156.54, 165.02 ( <i>o</i> -C <sub>6</sub> H <sub>4</sub> , C <sub>6</sub> H <sub>3</sub> , C <sub>6</sub> H <sub>5</sub> , N-C=, C=N); 169.48(C4); 175.47(C=O);                                                                                                                                                                     | 18.18(C3); 22.90(C5); 48.06(C2); 171.45(C1);                                                                                                                        |
| 7               | 25.12(-CH <sub>3</sub> ); 102.88(-CH=); 114.46, 119.04, 122.00, 122.74, 122.92, 123.68, 126.50, 127.49, 128.12, 128.58, 130.52, 136.40, 139.64, 142.54, 145.01, 152.43, 163.91( <i>o</i> -C <sub>6</sub> H <sub>4</sub> , C <sub>6</sub> H <sub>3</sub> , C <sub>6</sub> H <sub>5</sub> , N-C=, C=N, C6); 174.98(C=O);                                                                                                                                                                                              | 21.97(C5); 22.87(C5 <sup>*</sup> ); 24.94(C4); 28.35(C8); 41.76(C3); 52.33(C2); 80.01(C7); 165.09(C1);                                                              |
| 8               | 25.11(-CH <sub>3</sub> ); 102.91(-CH=); 114.47, 119.98, 121.99, 122.83, 122.93, 123.68, 125.05, 126.54, 127.10, 127.49, 127.73, 125.14, 130.54, 136.39, 141.33, 142.50, 143.87, 145.03, 152.38, 163.98 ( <i>o</i> -C <sub>6</sub> H <sub>4</sub> , C <sub>6</sub> H <sub>3</sub> , C <sub>6</sub> H <sub>5</sub> , N-C=, C=N, C <sub>12</sub> H <sub>8</sub> -Fmoc, C5); 175.03(C=O);                                                                                                                               | 17.80(C4); 19.06(C4 <sup>*</sup> ); 31.41(C3); 47.25(C7); 59.23(C2); 67.16(C6); 165.09(C1);                                                                         |
| 9               | 25.12(-CH <sub>3</sub> ); 102.91(-CH=); 114.48, 119.99, 122.82, 122.94, 123.68, 125.05, 126.54, 127.10, 127.49, 127.72, 128.14, 130.54, 136.39, 139.43, 141.34, 142.51, 143.78, 143.88, 145.04, 152.39; 163.97 ( <i>o</i> -C <sub>6</sub> H <sub>4</sub> , C <sub>6</sub> H <sub>3</sub> , C <sub>6</sub> H <sub>5</sub> , N-C=, C=N, C <sub>12</sub> H <sub>8</sub> -Fmoc, C7); 175.04(C=O);                                                                                                                       | 11.65(C6); 15.62(C4); 25.28(C5); 38.15(C3); 47.22(C9); 58.50(C2); 67.13(C8); 165.10(C1);                                                                            |
| 10              | 24.99,25.12(-CH <sub>3</sub> ;C4); 102.84(-CH=); 114.46, 119.10, 121.96, 122.55, 123.20, 123.73, 125.27, 126.41, 127.47, 128.09, 128.20, 128.70, 129.00, 130.47, 136.42, 139.77, 142.58, 144.96, 152.55, 163.82, 165.06( <i>o</i> -C <sub>6</sub> H <sub>4</sub> , C <sub>6</sub> H <sub>3</sub> , C <sub>6</sub> H <sub>5</sub> , N-C=, C=N); 174.90(C=O);                                                                                                                                                         | 22.21(C7); 29.47(C3); 47.80(C5); 58.84(C2); 169.50(C6); 171.49(C1);                                                                                                 |
| 11              | 24.93(-CH <sub>3</sub> ); 102.13(-CH=); 115.70, 119.23, 121.11, 122.02, 123.90, 126.57, 128.22, 128.87, 130.55, 135.86, 138.74, 142.03, 143.74, 154.79, 162.43, 166.02( <i>o</i> -C <sub>6</sub> H <sub>4</sub> , C <sub>6</sub> H <sub>3</sub> , C <sub>6</sub> H <sub>5</sub> , N-C=, C=N); 172.84(C=O);                                                                                                                                                                                                          | 22.35(C6); 40.80(C4); 41.68(C2); 168.98, 169.48, 169.74(C1,C3,C5);                                                                                                  |
| 3D <sub>1</sub> | 25.17 (-CH <sub>3</sub> ); 102.36 (-CH=C); 114.12, 114.72, 123.47, 125.84, 142.20, 142.35, 145.14 ( <i>o</i> -C <sub>6</sub> H <sub>4</sub> , C <sub>6</sub> H <sub>3</sub> ); 126.47, 127.06, 127.97, 128.62, 130.23, 133.82 (C <sub>6</sub> H <sub>3</sub> , C <sub>6</sub> H <sub>5</sub> ); 120.77, 120.94, 121.97, 129.01, 131.15, 132.29, 135.84, 151.43, 152.71, 162.81 (C <sub>6</sub> H <sub>3</sub> , C <sub>6</sub> H <sub>5</sub> , 157.059 (C=N); 173.92 (C=O)                                         | 164.75, 164.38 (C=O);                                                                                                                                               |
| 3D <sub>2</sub> | (-CH <sub>3</sub> ); 102.43 (-CH=); 114.30, 114.58, 123.46, 142.43, 145.26 ( <i>o</i> -C <sub>6</sub> H <sub>4</sub> , C <sub>6</sub> H <sub>3</sub> ); 152.69 (C=N); 174.43 (C=O); 120.40, 120.82, 120.98, 121.07, 121.13, 121.22, 121.32, 121.42, 121.50, 121.71, 121.94, 126.08, 126.56, 127.08, 127.13, 128.04, 128.69, 128.90, 129.06, 130.31, 130.44, 130.56, 130.70, 131.20, 133.94, 134.02, 151.16, 151.44, 151.48, 151.57, 151.64, 151.76 (C <sub>6</sub> H <sub>3</sub> , C <sub>6</sub> H <sub>5</sub> ) | 162.78, 164.40, 164.47 (C=O);                                                                                                                                       |
| 4D <sub>1</sub> | 25.13 (-CH <sub>3</sub> ); 102.89 (-CH=); 114.48, 114.58, 122.74, 122.81, 123.18, 123.22, 123.71, 142.56, 142.59, 145.02 ( <i>o</i> -C <sub>6</sub> H <sub>4</sub> , C <sub>6</sub> H <sub>3</sub> ); 152.53 (C=N); 174.98 (C=O); 119.18, 120.96, 121.06, 121.99, 126.50, 127.50, 128.13, 128.55, 128.71, 128.92, 129.05, 130.10, 130.30, 130.50, 133.47, 133.98, 136.43, 139.79, 151.53 (C <sub>6</sub> H <sub>3</sub> , C <sub>6</sub> H <sub>5</sub> )                                                           | 163.97, 164.62, 165.08 (C=O);<br><sup>b</sup>                                                                                                                       |
| 4D <sub>2</sub> | 25.11 (-CH <sub>3</sub> ); 102.78 (-CH=); 114.39, 114.68, 122.89, 123.21, 123.75, 142.65, 142.71, 145.11 ( <i>o</i> -C <sub>6</sub> H <sub>4</sub> , C <sub>6</sub> H <sub>3</sub> ); 152.35 (C=N); 175.02 (C=O); 121.15, 122.03, 126.45, 127.53, 128.11, 128.34, 128.81, 128.95, 130.21, 130.47, 133.52, 134.01, 136.34, 140.05, 151.35 (C <sub>6</sub> H <sub>3</sub> , C <sub>6</sub> H <sub>5</sub> .)                                                                                                          | 163.98, 164.52, 165.15 (C=O);<br><sup>b</sup>                                                                                                                       |
| 3D <sub>3</sub> | 25.16 (CH <sub>3</sub> ); 102.39 (-CH=); 114.357, 114.926, 120.866, 121.911, 123.474 ( <i>o</i> -C <sub>6</sub> H <sub>4</sub> ); 119.696, 126.08, 126.12, 127.42, 127.57, 127.80, 127.93, 128.15, 128.44, 130.52, 136.09, 137.04, 140.685, 142.695, 145.071, 150.160, 152.767, 164.88 (C <sub>6</sub> H <sub>3</sub> , C <sub>6</sub> H <sub>5</sub> .); 158.33 (C=N); 174.56 (C=O)                                                                                                                                | 70.11( <sup>b</sup> ), 71.83( <sup>a</sup> ) (-CH <sub>2</sub> -); 101.72, 106.56, 160.04 (C <sub>6</sub> H <sub>3</sub> );<br><sup>b</sup>                         |
| 3D <sub>4</sub> | 25.13 (-CH <sub>3</sub> ); 102.40 (-CH=); 114.358, 114.935, 119.00, 119.27, 119.34, 120.796, 121.91, 123.47 (C <sub>6</sub> H <sub>3</sub> , <i>o</i> -C <sub>6</sub> H <sub>4</sub> ); 174.54 (C=O); 125.09, 125.99, 126.18, 127.42, 127.56, 127.91, 128.20, 128.52, 130.58, 136.90, 139.48, 140.68, 142.68, 145.04, 145.25, 150.19, 152.77, 159.94, 160.11, 164.90 ( <i>o</i> -C <sub>6</sub> H <sub>4</sub> , C <sub>6</sub> H <sub>5</sub> , C <sub>6</sub> H <sub>3</sub> , C=N)                               | 70.01( <sup>b</sup> ), 70.09( <sup>c</sup> ), 71.69( <sup>a</sup> ) (-CH <sub>2</sub> -); 101.73, 106.52, 106.41 (C <sub>6</sub> H <sub>3</sub> );<br><sup>b</sup>  |
| 3D <sub>5</sub> | 25.15 (-CH <sub>3</sub> ); 101.68, 106.53, 106.34, 127.49, 127.96, 128.11, 128.58, 136.79, 139.30, 160.05, 160.21 ( <i>o</i> -C <sub>6</sub> H <sub>4</sub> , C <sub>6</sub> H <sub>5</sub> , C <sub>6</sub> H <sub>3</sub> , C=N)                                                                                                                                                                                                                                                                                  | 70.01, 70.11, 71.70 (-CH <sub>2</sub> -);<br><sup>b</sup>                                                                                                           |
| 4D <sub>3</sub> | 25.16 (-CH <sub>3</sub> ); 102.74 (-CH=); 113.11, 114.38, 118.71, 121.92, 123.00, 148.71 (C <sub>6</sub> H <sub>3</sub> , <i>o</i> -C <sub>6</sub> H <sub>4</sub> ); 174.86 (C=O); 123.55, 125.29, 125.94, 126.93, 127.52, 127.97, 128.09, 128.21, 128.57, 129.02, 130.43, 136.55, 136.87, 139.81, 142.85, 144.76, 152.08, 160.19, 162.11, 164.93 (C <sub>6</sub> H <sub>3</sub> , C <sub>6</sub> H <sub>5</sub> , C=N.)                                                                                            | 70.15( <sup>b</sup> ), 70.82( <sup>a</sup> ) (-CH <sub>2</sub> -); 101.60, 106.35 (C <sub>6</sub> H <sub>3</sub> );<br><sup>b</sup>                                 |
| 4D <sub>4</sub> | 25.13 (-CH <sub>3</sub> ); 102.69 (-CH=); 113.16, 114.41, 118.71, 121.85, 122.90, 123.53, 148.623, ( <i>o</i> -C <sub>6</sub> H <sub>4</sub> , C <sub>6</sub> H <sub>3</sub> ); 174.738 (C=O); 125.874, 130.382, 136.525, 139.809, 142.775, 144.672, 152.055, 161.978, 126.77, 127.35, 127.50, 127.67, 127.93, 128.07, 128.33, 128.53, 136.81, 139.29, 160.04, 160.18, 164.874 (C <sub>6</sub> H <sub>5</sub> , C <sub>6</sub> H <sub>3</sub> , C=N.)                                                               | 69.98( <sup>b</sup> ), 70.12( <sup>c</sup> ), 70.72( <sup>a</sup> ) (-CH <sub>2</sub> -); 101.614, 106.28, 106.41 (C <sub>6</sub> H <sub>3</sub> );<br><sup>b</sup> |
| 4D <sub>5</sub> | 25.12 (-CH <sub>3</sub> ); 101.70, 106.32, 106.44, 127.50, 127.94, 128.09, 128.54, 136.84, 139.27, 160.09, 160.19 (C <sub>6</sub> H <sub>5</sub> , C <sub>6</sub> H <sub>3</sub> , <i>o</i> -C <sub>6</sub> H <sub>4</sub> , C=N)                                                                                                                                                                                                                                                                                   | 70.04, 70.13, 70.81( <sup>a</sup> ) (-CH <sub>2</sub> -);<br><sup>b</sup>                                                                                           |

<sup>a</sup> -in DMSO, <sup>b</sup> some signals obscured by that of Schiff base part (column 2)

**Table . IR data**

| Complex                           | $\nu$ (cm <sup>-1</sup> )                                               |
|-----------------------------------|-------------------------------------------------------------------------|
| <b>2</b>                          | 1608 (v C=O);                                                           |
| <b>3</b>                          | 3405 (v O-H); 1610 (v C=O);                                             |
| <b>4</b>                          | 3110b (v O-H); 1610 (v C=O);                                            |
| <b>5</b>                          | 3395b (v N-H); 1748 (v C=O ester); 1668 (v C=O amide);<br>1613 (v C=O); |
| <b>6</b>                          | 3404b (v N-H); 1751 (v C=O ester); 1662 (v C=O amide);<br>1614 (v C=O)  |
| <b>7</b>                          | 3430b (v N-H); 1761 (v C=O ester ); 1712 (v C=O amide);                 |
| <b>8</b>                          | 3412b (v N-H); 1756 (v C=O ester); 1721 (v C=O amide);<br>1620 (v C=O); |
| <b>9</b>                          | 3415b (v N-H); 1755 (v C=O ester); 1718 (v C=O amide);<br>1620 (v C=O); |
| <b>10</b>                         | 3445b (v N-H); 1759 (v C=O ester); 1646b (v C=O amide);                 |
| <b>11</b>                         | 3408 (v N-H); 1766 (v C=O ester); 1654b (v C=O amide);                  |
| <b>3D<sub>1</sub><sup>b</sup></b> | 1715 (v C=O ester)                                                      |
| <b>3D<sub>2</sub><sup>b</sup></b> | 1713 (v C=O ester)                                                      |
| <b>4D<sub>1</sub><sup>b</sup></b> | 1716 (v C=O ester)                                                      |
| <b>4D<sub>2</sub><sup>b</sup></b> | 1720 (v C=O ester)                                                      |
| <b>3D<sub>3</sub><sup>b</sup></b> | 3029, 3058 (v C-H arom.); 2925 (v C-H aliph.); 1607 (v<br>C=O);         |
| <b>3D<sub>4</sub><sup>b</sup></b> | 3032, 3063, 3089 (v C-H arom.); 2926 (v C-H aliph.); 1609 (v<br>C=O);   |
| <b>3D<sub>5</sub><sup>b</sup></b> | 3035, 3060, 3090 (v C-H arom.); 2920-2930 (v C-H aliph.);               |
| <b>4D<sub>3</sub><sup>b</sup></b> | 3035, 3058 (v C-H arom.); 2920 (v C-H aliph.);                          |
| <b>4D<sub>4</sub><sup>b</sup></b> | 3030, 3060, 3090 (v C-H arom.); 2920-2930 (v C-H aliph.);               |
| <b>4D<sub>5</sub><sup>b</sup></b> | 3034, 3066, 3085 (v C-H arom.); 2920-2930 (v C-H aliph.);               |

<sup>a</sup> in KBr , <sup>b</sup> in hexachlorobutadiene

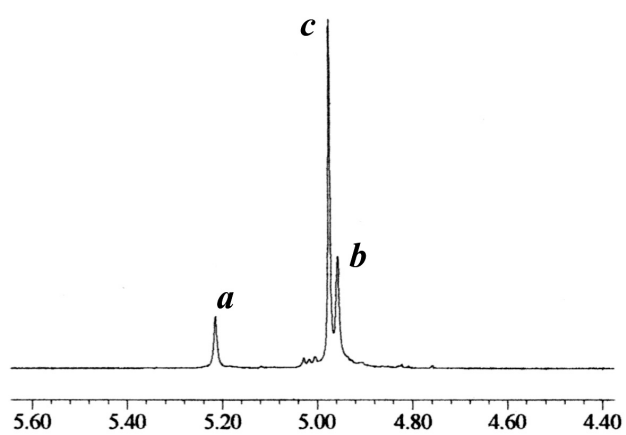

$^1\text{H}$  NMR spectrum of  $3\text{D}_4$  showing signals of methylene groups.

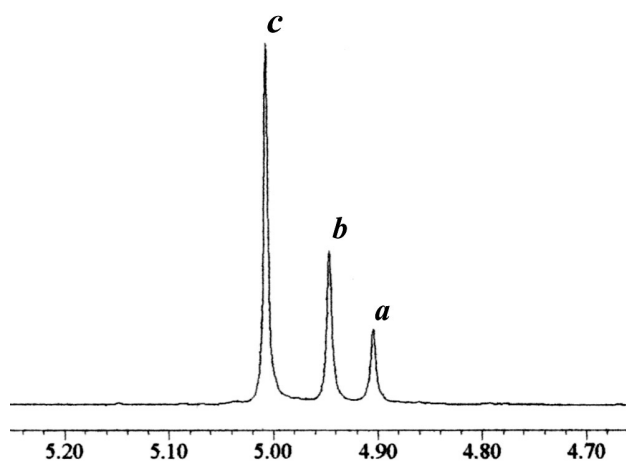

$^1\text{H}$  NMR spectrum of  $4\text{D}_4$  showing signals of methylene groups.

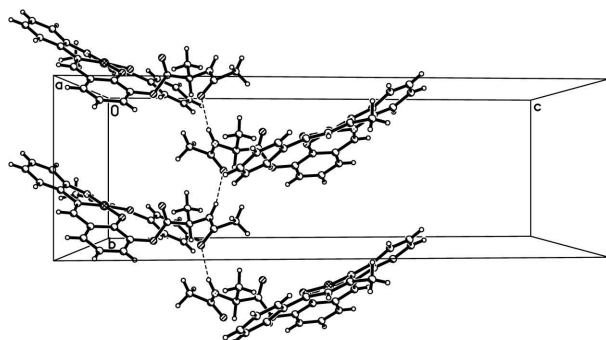

Packing diagram of the **6** complex viewed along the *a* axis. Hydrogen bonds are shown by dashed lines. The intermolecular N-H...O hydrogen bonds link molecules into infinite homochiral chains extending along *b* axis.
